# Supplementary material for: Spin crossover in {Fe(pyrazine)[M(CN)4]} (M = Ni, Pt) thin films assembled on fused silica substrates
Source: Royal Society of Chemistry journal article supplement (doi:10.1039/d4dt00454j), 2024-01-01
Supplement: d4dt00454j1.pdf [file d4dt00454j1.pdf]

# **Spin crossover in {Fe(pyrazine)[M(CN)<sub>4</sub>]} (M = Ni, Pt) thin films assembled on fused silica substrates**

Fayan Lai<sup>1</sup>, Gábor Molnár<sup>1\*</sup>, Saioa Cobo<sup>1\*</sup> and Azzedine Bousseksou<sup>1\*</sup>

<sup>1</sup> LCC, CNRS and Université de Toulouse (UPS, INP), Toulouse, France

## **Table of contents**

- 1. <sup>1</sup>H RMN and IR spectra of {(TBA)<sub>2</sub>Ni(CN)<sub>4</sub>}**
- 2. AFM images and profiles**
- 3. Energy Dispersive X-ray analysis**
- 4. IR and Raman spectra**
- 5. Effect of the reactant concentration on the fabrication and properties of the films**
- 6. Temperature dependence of the absorbance**
- 7. Grazing incidence X-ray diffraction**

1.  $^1\text{H}$  RMN and IR spectra of  $\{(\text{TBA})_2\text{Ni}(\text{CN})_4\}$

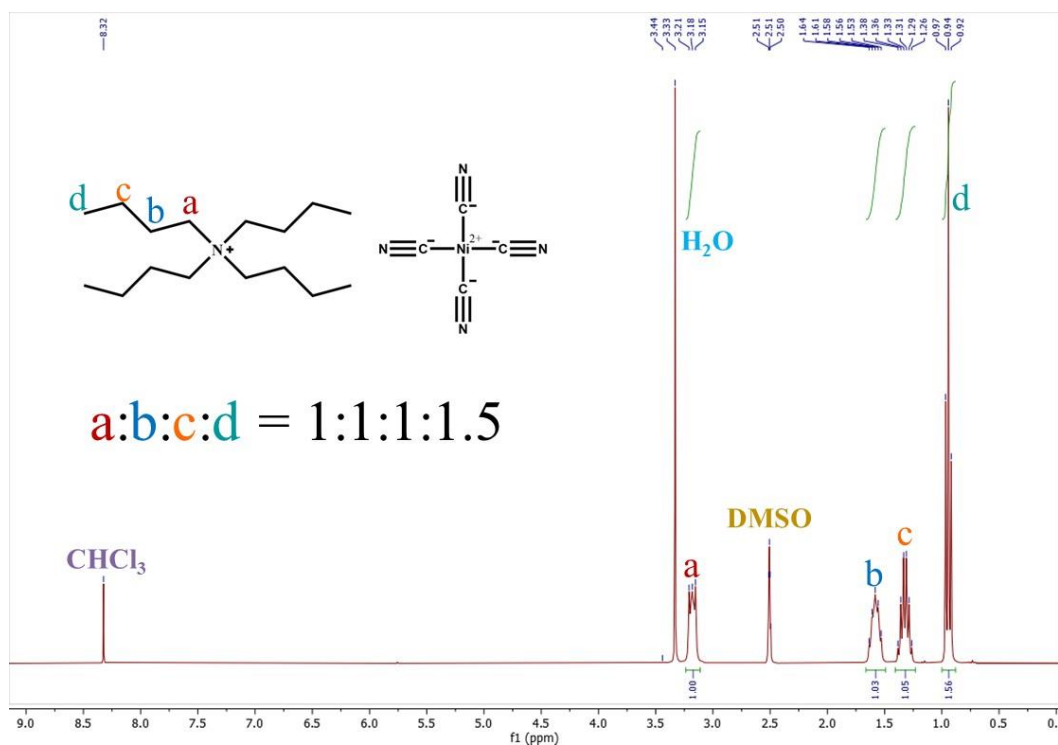

Figure S1.  $^1\text{H}$  NMR spectrum of  $\{(\text{TBA})_2\text{Ni}(\text{CN})_4\}$

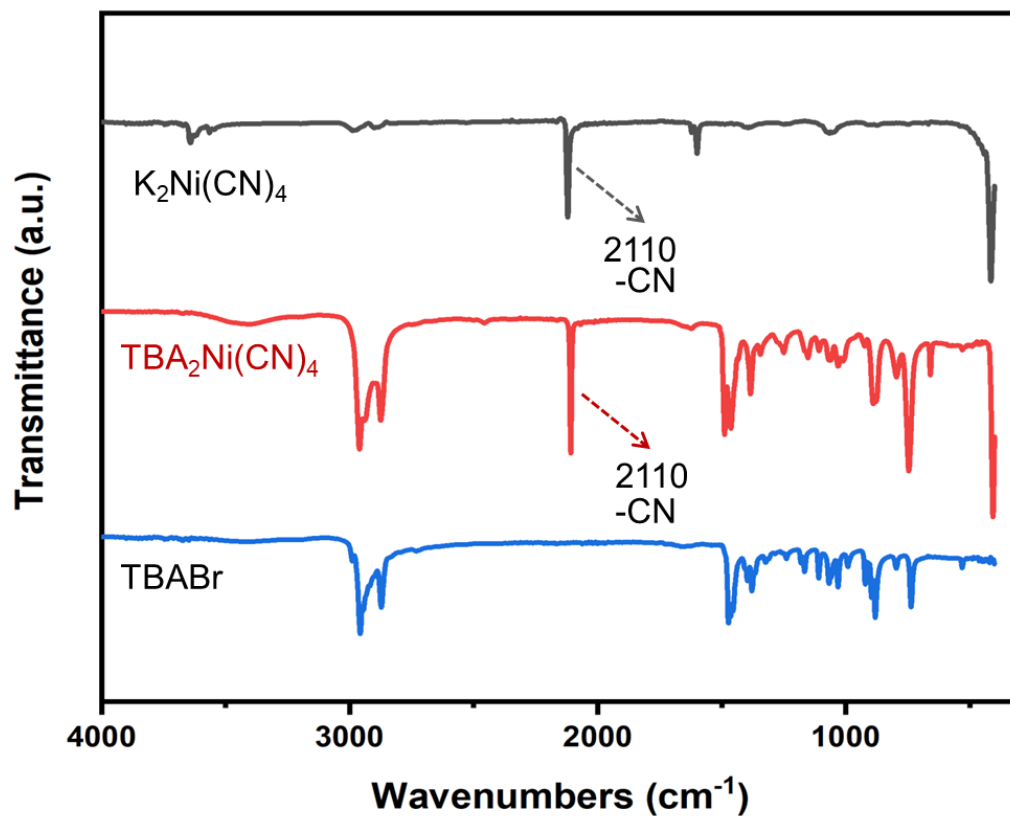

Figure S2. Infrared spectra of  $\{(\text{TBA})_2\text{Ni}(\text{CN})_4\}$ ,  $\text{K}_2\text{Ni}(\text{CN})_4$  and  $\text{TBABr}$

## 2. AFM images and profiles

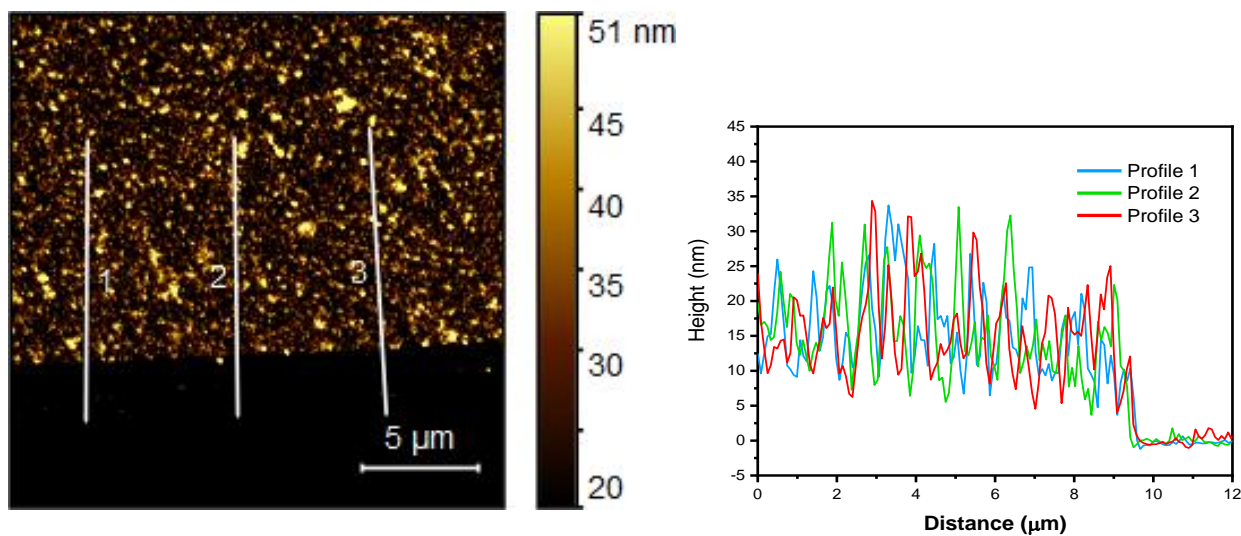

**Figure S3.** Representative AFM image and cross-sections of a thin film of **1-Ni** following 4 deposition cycles. (Mean Thickness: 14 nm; Mean Roughness: 6 nm.)

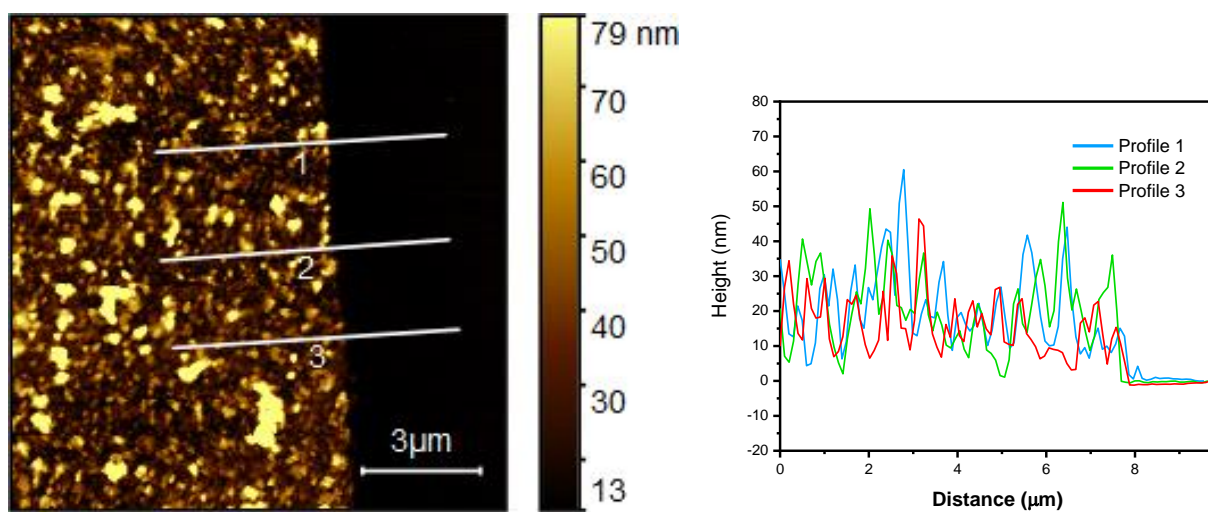

**Figure S4.** Representative AFM image and cross-sections of a thin film of **1-Ni** following 8 deposition cycles. (Mean Thickness: 25 nm; Mean Roughness: 15 nm.)

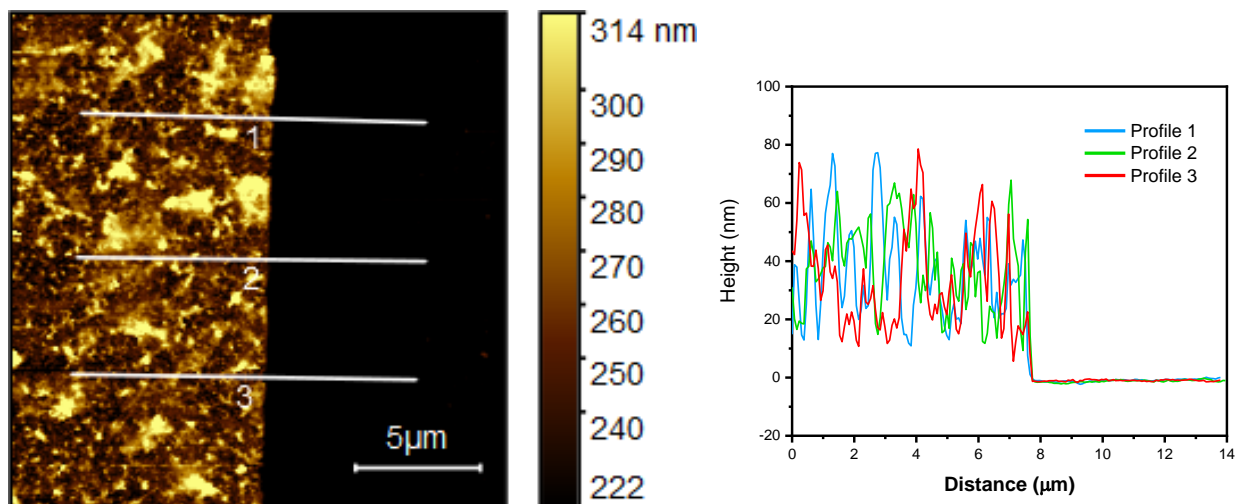

**Figure S5.** Representative AFM image and cross-sections of a thin film of **1-Ni** following 12 deposition cycles. (Mean Thickness: 36 nm; Mean Roughness: 18 nm.)

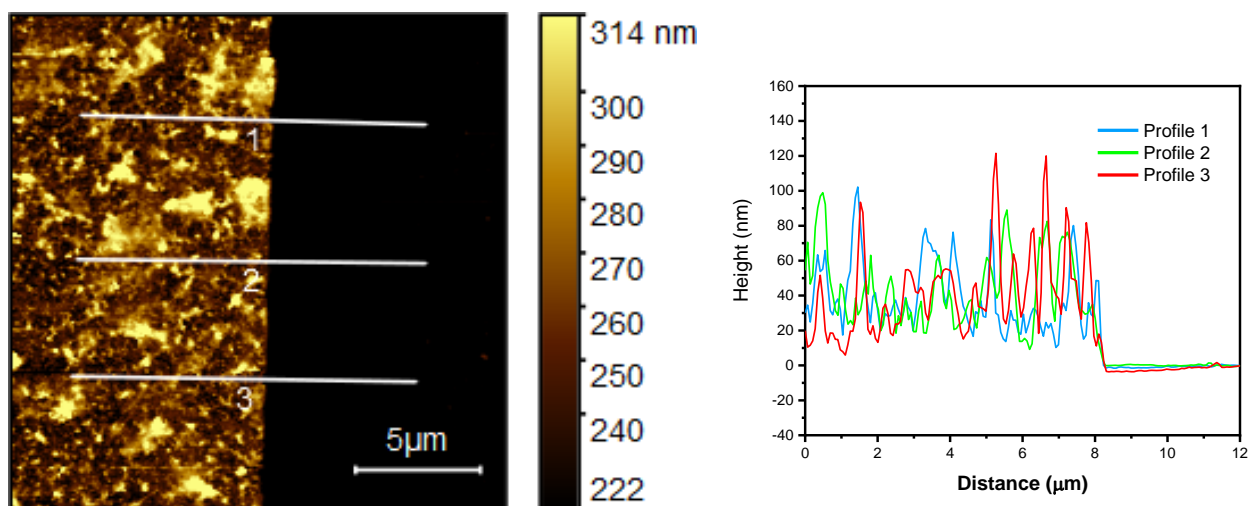

**Figure S6.** Representative AFM image and cross-sections of a thin film of **1-Ni** following 16 deposition cycles. (Mean Thickness: 40 nm; Mean Roughness: 20 nm.)

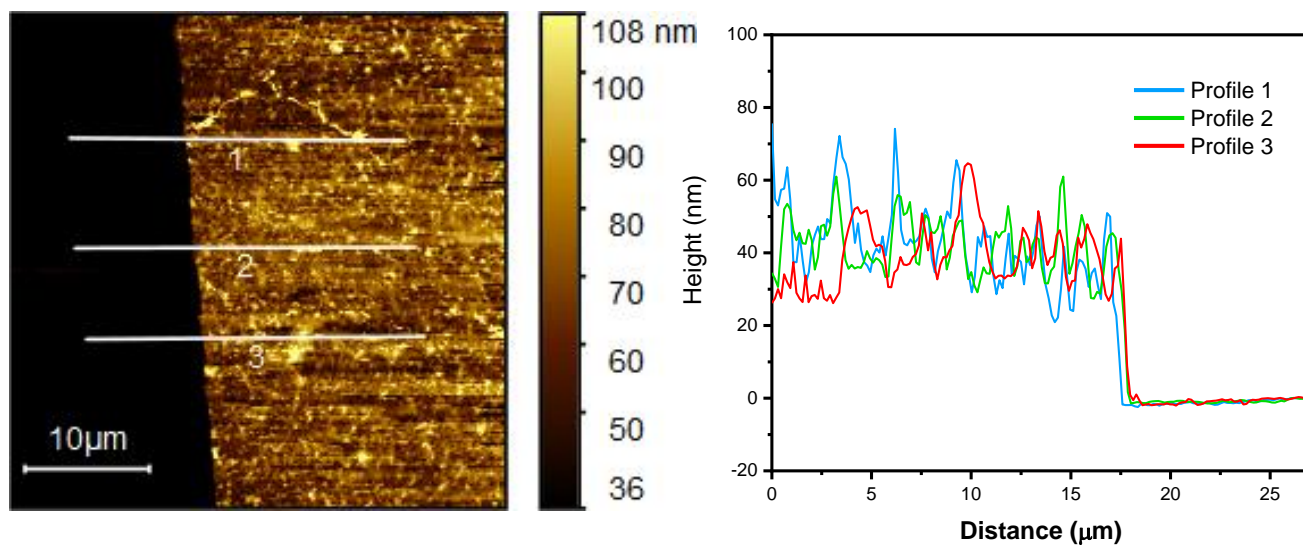

**Figure S7.** Representative AFM image and cross-sections of a thin film of **1-Ni** following 20 deposition cycles. (Mean Thickness: 46 nm; Mean Roughness: 10 nm.)

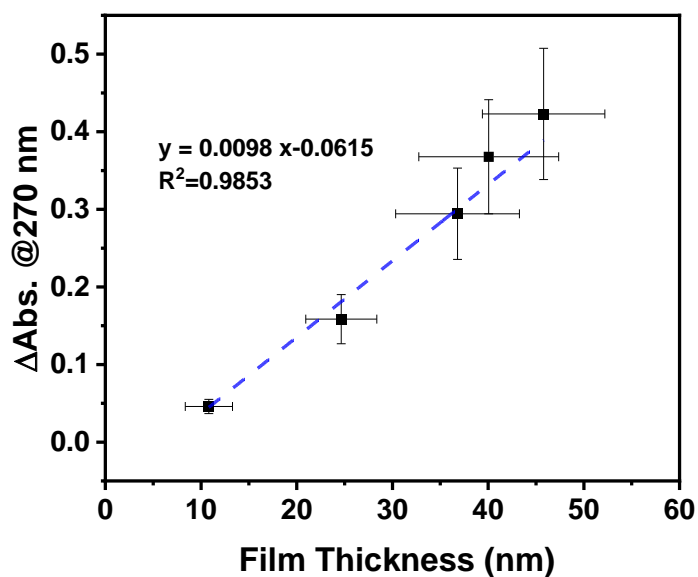

**Figure S8.** Absorbance at 270 nm vs. film thickness for **1-Ni**. (The film thickness was measured by AFM, the blue dotted line is a visual guide.)

### 3. Energy Dispersive X-ray analysis

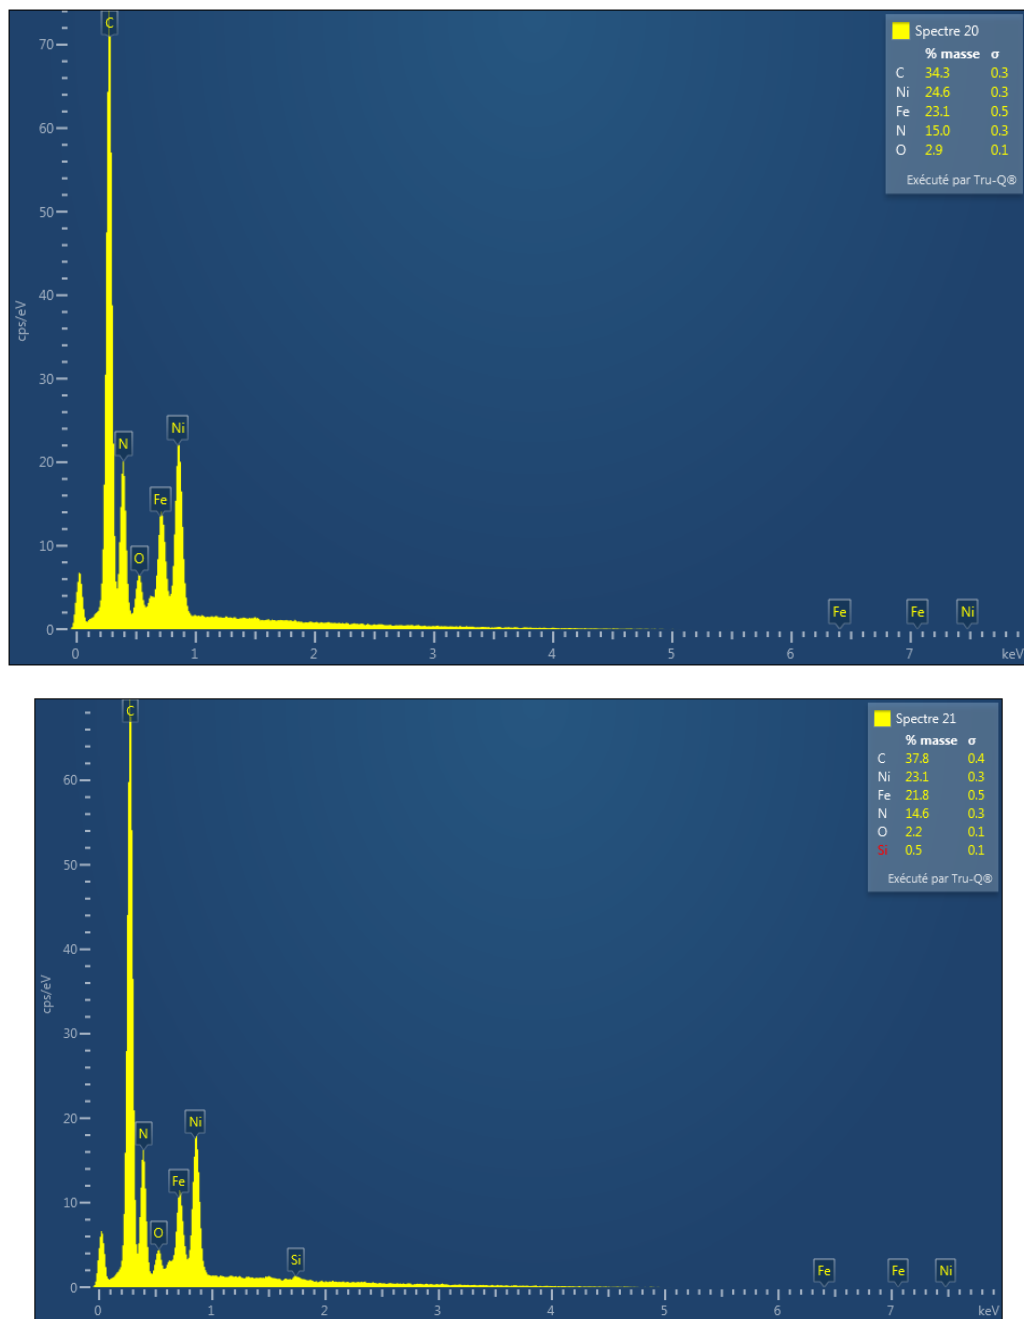

**Figure S9:** Representative EDX analysis data of a 1-Ni film ( $c = 50$  mM,  $N = 50$  cycles).

#### 4. IR and Raman spectra

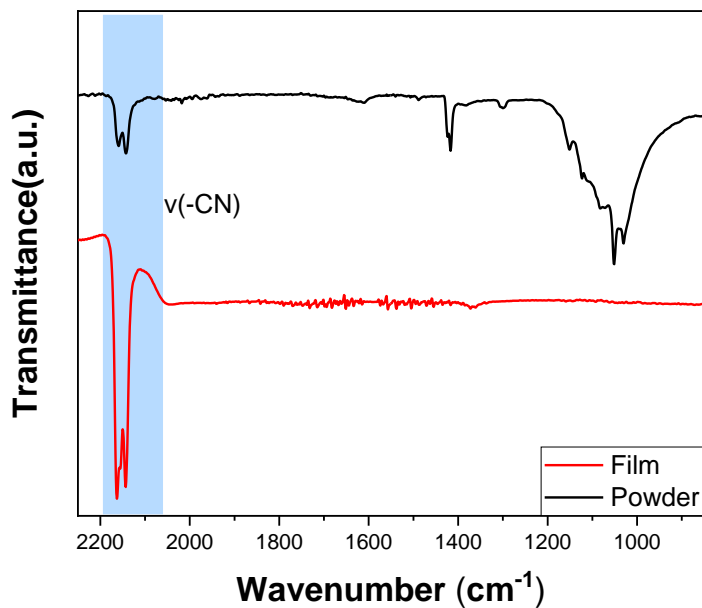

**Figure S10.** IR spectra of the **1-Ni** powder and thin film ( $c = 50$  mM,  $N = 50$  cycles). Note that the FS substrate in transmission mode allows only the observation of the CN stretching modes in the film.

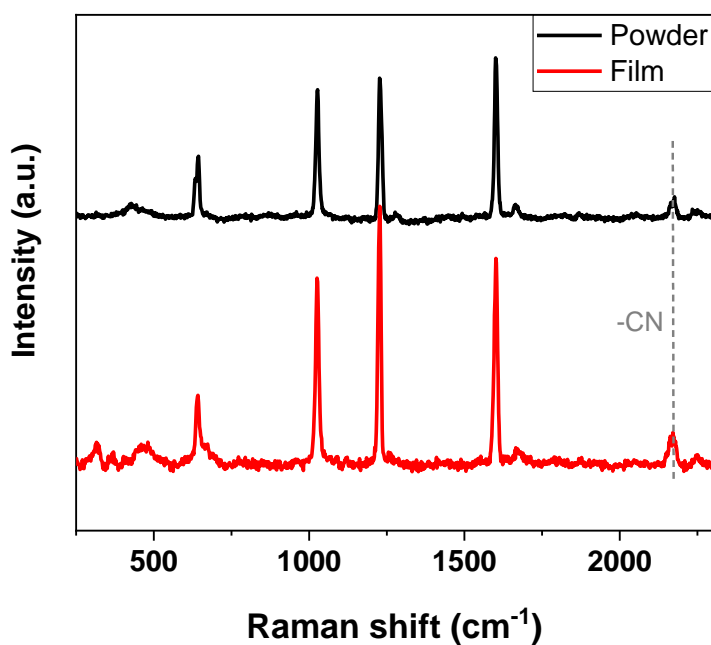

**Figure S11.** Raman spectra of the **1-Ni** powder and thin film ( $c = 50$  mM,  $N = 50$  cycles).

## 5. Effect of the reactant concentration on the fabrication and properties of the films

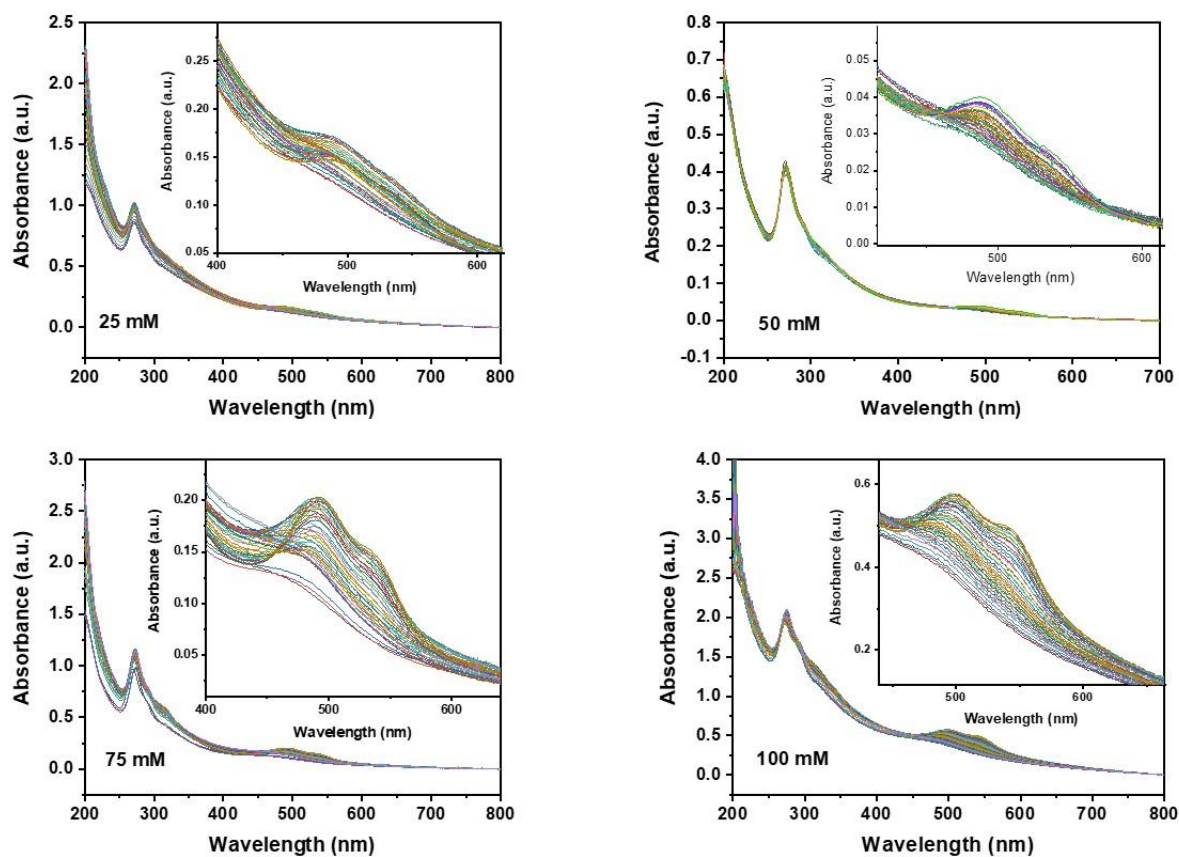

**Figure S12.** Evolution of a UV–visible absorption spectra of **1-Ni** films recorded upon cooling ( $N = 16$  cycles,  $T = 213$  K). The films were fabricated at different reactant concentrations (25 mM, 50 mM, 75 mM and 100 mM).



## 6. Temperature dependence of the absorbance

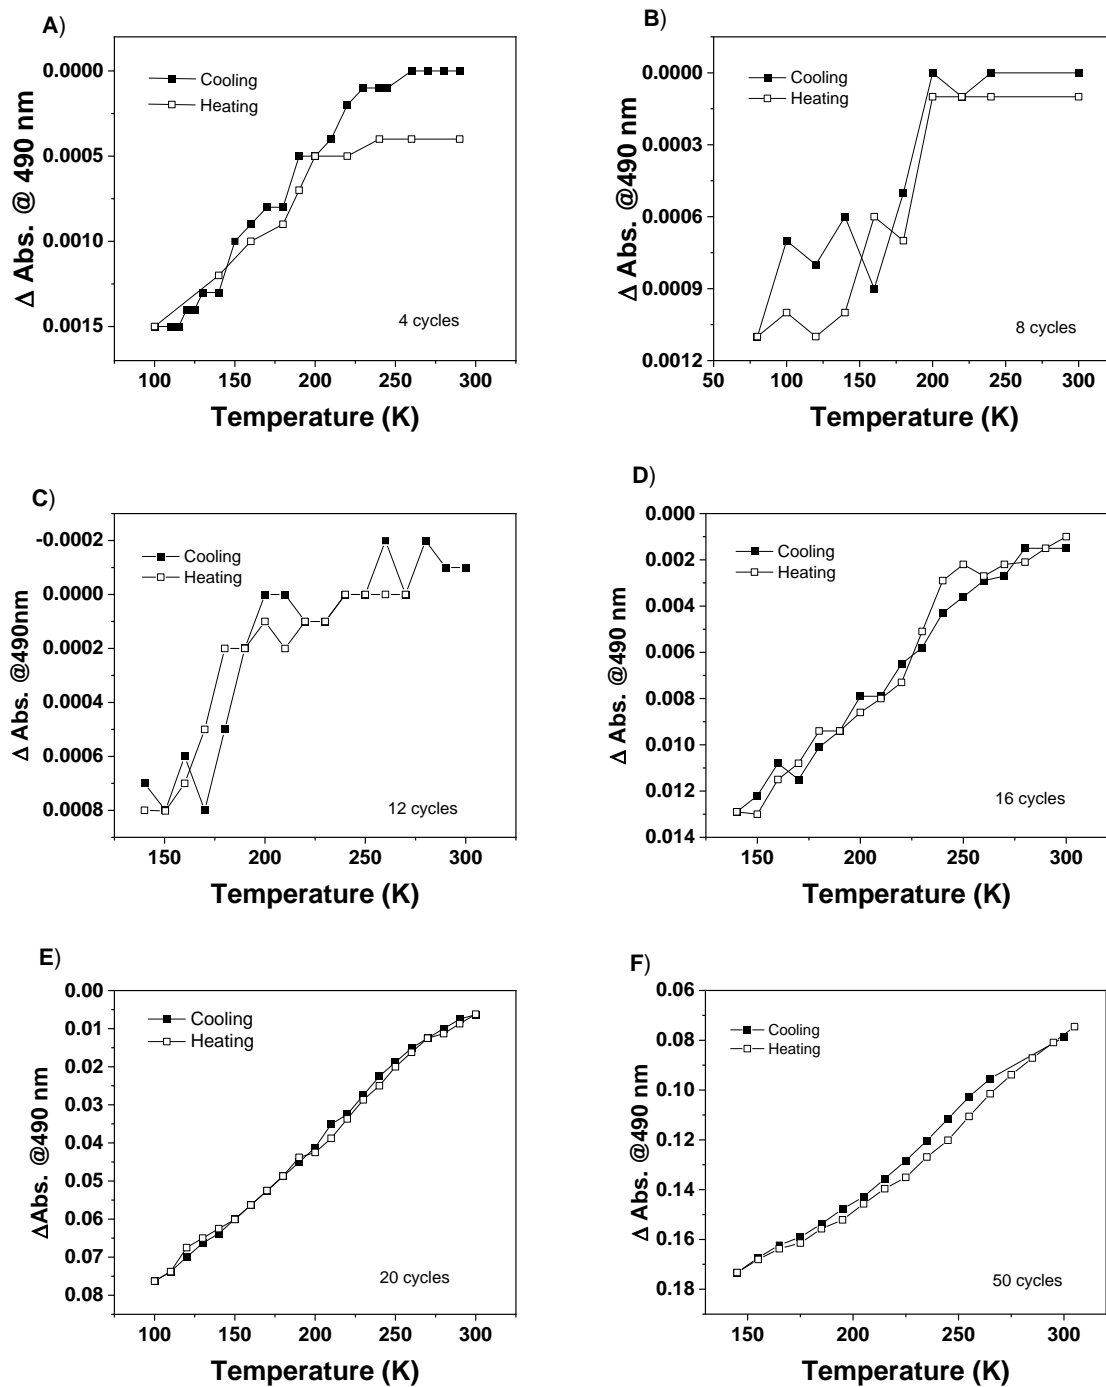

**Figure S13.** Temperature dependence of the absorbance band intensity at 490 nm of 1-Ni for A) 4, B) 8, C) 12, D) 16, E) 20 and F) 50 deposition cycles ( $T = 213 \text{ K}$ ,  $c = 50 \text{ mM}$ ).

## 7. Grazing incidence X-ray diffraction

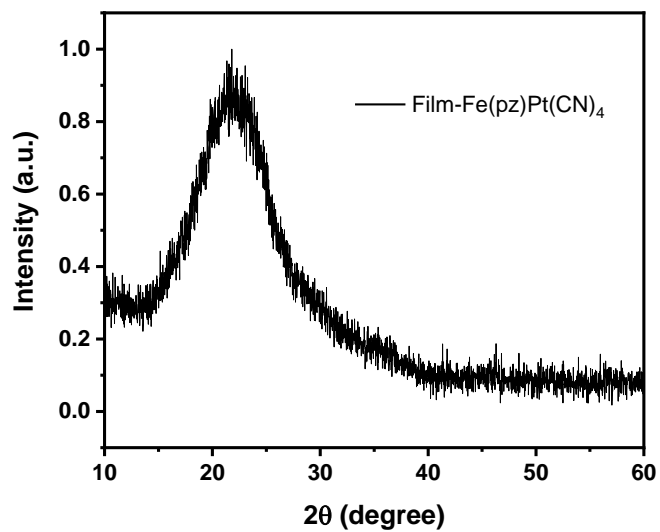

**Figure S14.** Representative GI-XRD pattern of a film of **1-Pt** for  $N = 16$  cycles.
